# Supplementary material
Source: publisher figshare collection journal article supplement (https://sage.figshare.com/ndownloader/files/16832330)
Supplement: Supplementary file 1 [file 16832330]

## Appendix A. KEEN Grant Survey.

1. Please rate your current level of knowledge/ability regarding identifying an opportunity.

|     |   |        |   |      |
|-----|---|--------|---|------|
| Low |   | Medium |   | High |
| 0   | 1 | 2      | 3 | 4    |

2. Please rate your current level of knowledge/ability regarding investigating a market.

|     |   |        |   |      |
|-----|---|--------|---|------|
| Low |   | Medium |   | High |
| 0   | 1 | 2      | 3 | 4    |

3. Please rate your current level of knowledge/ability regarding creating a preliminary business model.

|     |   |        |   |      |
|-----|---|--------|---|------|
| Low |   | Medium |   | High |
| 0   | 1 | 2      | 3 | 4    |

4. Please rate your current level of knowledge/ability regarding examining technical feasibility, customer value, societal benefits and economic viability.

|     |   |        |   |      |
|-----|---|--------|---|------|
| Low |   | Medium |   | High |
| 0   | 1 | 2      | 3 | 4    |

5. Please rate your currently level of knowledge regarding testing concepts quickly via customer engagement.

|     |   |        |   |      |
|-----|---|--------|---|------|
| Low |   | Medium |   | High |
| 0   | 1 | 2      | 3 | 4    |

6. Please rate your currently level of knowledge regarding assessing policy and regulatory issues.

|     |   |        |   |      |
|-----|---|--------|---|------|
| Low |   | Medium |   | High |
| 0   | 1 | 2      | 3 | 4    |

7. Please rate your currently level of knowledge regarding determining design requirements.

|     |   |        |   |      |
|-----|---|--------|---|------|
| Low |   | Medium |   | High |
| 0   | 1 | 2      | 3 | 4    |

8. Please rate your currently level of knowledge regarding performing technical design.

|     |   |        |   |      |
|-----|---|--------|---|------|
| Low |   | Medium |   | High |
| 0   | 1 | 2      | 3 | 4    |

9. Please rate your currently level of knowledge regarding analyzing design solutions.

|     |   |        |   |      |
|-----|---|--------|---|------|
| Low |   | Medium |   | High |
| 0   | 1 | 2      | 3 | 4    |

10. Please rate your currently level of knowledge regarding creating models and prototypes.

|     |   |        |   |      |
|-----|---|--------|---|------|
| Low |   | Medium |   | High |
| 0   | 1 | 2      | 3 | 4    |

11. Please rate your currently level of knowledge regarding validating designs.

|     |   |        |   |      |
|-----|---|--------|---|------|
| Low |   | Medium |   | High |
| 0   | 1 | 2      | 3 | 4    |

12. Please rate your currently level of knowledge regarding communicating engineering solutions in economic terms.

|     |   |        |   |      |
|-----|---|--------|---|------|
| Low |   | Medium |   | High |
| 0   | 1 | 2      | 3 | 4    |

13. Please rate your currently level of knowledge regarding communicating engineering solutions in terms of societal benefits.

|     |   |        |   |      |
|-----|---|--------|---|------|
| Low |   | Medium |   | High |
| 0   | 1 | 2      | 3 | 4    |

14. Please rate your currently level of knowledge regarding validating market interest.

|     |   |        |   |      |
|-----|---|--------|---|------|
| Low |   | Medium |   | High |
| 0   | 1 | 2      | 3 | 4    |

15. Please rate your currently level of knowledge regarding developing partnerships and building a team.

|     |   |        |   |      |
|-----|---|--------|---|------|
| Low |   | Medium |   | High |
| 0   | 1 | 2      | 3 | 4    |

16. Please rate your currently level of knowledge regarding identifying supply chains and distribution methods.

|     |   |        |   |      |
|-----|---|--------|---|------|
| Low |   | Medium |   | High |
| 0   | 1 | 2      | 3 | 4    |

17. Please rate your currently level of knowledge regarding protecting intellectual property.

|     |   |        |   |      |
|-----|---|--------|---|------|
| Low |   | Medium |   | High |
| 0   | 1 | 2      | 3 | 4    |

## Appendix B. Summary Pre- and Post-Years 1-3 (2015-2017) Survey Results.

### Survey Questions

- Q1: Identifying an opportunity
- Q2: Investigating a market
- Q3: Creating a preliminary business model
- Q4: Examining technical feasibility, customer value, societal benefits and economic viability
- Q5: Testing concepts with customers
- Q6: Assessing policy and regulatory issues
- Q7: Determining design requirements
- Q8: Performing technical design
- Q9: Analyzing design solutions
- Q10: Creating models and prototypes
- Q11: Validating designs
- Q12: Communicating engineering solutions in economic terms
- Q13: Communicating engineering solutions in terms of societal benefits
- Q14: Validating market interest
- Q15: Developing partnerships and building a team
- Q16: Identifying supply chains and distribution methods
- Q17: Protecting intellectual property

### Year 1 (2015) Pre- and Post-Results by Q1-Q17 Averages, Percentages, and Standard Deviations

|          | 2015 Q1 | Q2    | Q3    | Q4    | Q5    | Q6    | Q7    | Q8    | Q9    | Q10   | Q11   | Q12   | Q13  | Q14   | Q15   | Q16   | Q17  |
|----------|---------|-------|-------|-------|-------|-------|-------|-------|-------|-------|-------|-------|------|-------|-------|-------|------|
| Pre      | 2.39    | 1.47  | 1.26  | 2.03  | 1.83  | 1.68  | 2.83  | 2.84  | 2.96  | 2.93  | 2.43  | 2.26  | 2.20 | 1.66  | 2.69  | 1.71  | 1.92 |
| Pre SD   | 0.632   | 0.9   | 0.834 | 0.941 | 0.743 | 1.242 | 0.737 | 0.775 | 0.516 | 0.676 | 0.862 | 0.961 | 1.13 | 0.64  | 0.915 | 0.91  | 1.06 |
| Post     | 2.94    | 2.58  | 2.24  | 3.01  | 3.07  | 2.58  | 3.60  | 3.58  | 3.60  | 3.54  | 3.36  | 3.01  | 3.28 | 2.47  | 3.10  | 2.31  | 2.75 |
| Post SD  | 0.594   | 0.737 | 0.756 | 0.756 | 0.704 | 0.724 | 0.64  | 0.488 | 0.516 | 0.516 | 0.64  | 0.535 | 0.70 | 0.743 | 0.68  | 0.799 | 0.64 |
| % Change | 23%     | 76%   | 78%   | 48%   | 68%   | 54%   | 27%   | 26%   | 22%   | 21%   | 38%   | 33%   | 49%  | 49%   | 15%   | 35%   | 43%  |

### Year 2 (2016) Pre- and Post-Results by Q1-Q17 Averages, Percentages and Standard Deviations

|          | 2016 Q1 | Q2    | Q3    | Q4    | Q5    | Q6    | Q7    | Q8    | Q9    | Q10   | Q11   | Q12   | Q13   | Q14   | Q15   | Q16   | Q17   |
|----------|---------|-------|-------|-------|-------|-------|-------|-------|-------|-------|-------|-------|-------|-------|-------|-------|-------|
| Pre      | 2.60    | 1.58  | 1.11  | 2.4   | 1.95  | 2.09  | 3.23  | 3.28  | 3.18  | 3.18  | 2.89  | 2.47  | 2.49  | 1.74  | 2.68  | 1.74  | 2.39  |
| Pre SD   | 0.64    | 0.89  | 0.825 | 0.976 | 0.74  | 1.02  | 0.722 | 0.747 | 0.519 | 0.671 | 0.859 | 0.97  | 1.04  | 0.71  | 0.873 | 0.98  | 1.12  |
| Post     | 3.12    | 2.53  | 1.99  | 2.96  | 2.90  | 2.48  | 3.55  | 3.48  | 3.49  | 3.45  | 3.30  | 3.02  | 3.21  | 2.62  | 3.11  | 2.34  | 2.98  |
| Post SD  | 0.618   | 0.761 | 0.775 | 0.828 | 0.727 | 0.863 | 0.639 | 0.597 | 0.521 | 0.594 | 0.775 | 0.743 | 0.862 | 0.684 | 0.676 | 0.831 | 0.756 |
| % Change | 20%     | 60%   | 79%   | 23%   | 49%   | 19%   | 10%   | 6%    | 10%   | 8%    | 14%   | 22%   | 29%   | 51%   | 16%   | 34%   | 25%   |

### Year 3 (2017) Pre- and Post-Results by Q1-Q17 Averages, Percentages and Standard Deviations

|          | 2017 Q1 | Q2    | Q3    | Q4   | Q5    | Q6    | Q7    | Q8    | Q9    | Q10   | Q11   | Q12   | Q13   | Q14   | Q15   | Q16   | Q17   |
|----------|---------|-------|-------|------|-------|-------|-------|-------|-------|-------|-------|-------|-------|-------|-------|-------|-------|
| Pre      | 2.10    | 1.38  | 1.08  | 1.82 | 1.95  | 1.57  | 2.97  | 3.15  | 3.03  | 3.15  | 2.15  | 2.15  | 2.31  | 1.74  | 2.77  | 1.74  | 1.75  |
| Pre SD   | 0.92    | 0.953 | 0.958 | 1.02 | 1.14  | 1.12  | 0.829 | 0.795 | 0.877 | 0.876 | 0.731 | 1.02  | 1.03  | 0.852 | 0.852 | 1.02  | 1.26  |
| Post     | 3.18    | 2.68  | 2.48  | 2.97 | 2.92  | 2.45  | 3.48  | 3.55  | 3.53  | 3.52  | 3.02  | 3.02  | 3.11  | 2.59  | 3.14  | 2.62  | 3.10  |
| Post SD  | 0.701   | 0.857 | 0.827 | 0.86 | 0.922 | 0.955 | 0.644 | 0.622 | 0.622 | 0.648 | 0.816 | 0.806 | 0.833 | 0.667 | 0.667 | 0.915 | 0.768 |
| % Change | 51%     | 94%   | 130%  | 63%  | 50%   | 56%   | 17%   | 13%   | 17%   | 12%   | 40%   | 40%   | 35%   | 49%   | 13%   | 51%   | 77%   |
